# Supplementary material
Source: PubMed Central journal article supplement (PMC1892958)
Supplement: pnas_0611110104_2.pdf [file pnas_0611110104_2.pdf]

Ta LRYKVIK-HPNLVTVKMDLEEPSLAG-----FRDDCI**R**NLFMFLDSSKR-----FYLISALYDTEVNWKV 75  
 Cn IAHPDVISHAPVKGAAEWKAELT--LASANHATPTL**KT**LLFK**PTAK**SAVPTPVMVLAQENTETPSGA 123  
 Um IQTEKAVKHAAATSPESWRSVADVASSLGLTSQNFT**KT**TVVFK**PTAK**TAAPTVPVLIKADDSYNTGA 81  
 Pf INFKEVK-HGLAATIKDLLEMNLE-----NSTNIL**KN**LFLK**DKKN**-----YFLICTLNNKTVDLKN 86  
 Py INYKEVK-HGKVNSIKEILDNLLE-----KSENV**IK**NLFLK**DKKN**-----YFYLCVANWKKLDLKN 85  
 Cp INYSKFD-HDATPNMESMVEVLKEQ---AEKHNTDFA**KN**LLIK**SK**NEG----LFFVLAHHETDTKMKN 111  
 Pt VADG-----TAYV**KN**LLLYVD**K**KS-----YYLILANHTTQVGKL 42  
 Sp TDDLKLV**HQ**EVSNNGATWASALQS---TKDVP**SHAL**T**KT**IVL**KP****KTAK**SQTV**VP**IILAALETTSTPSGI 80  
 Sc VNEKPPA-**E**SAVA-----V**K**SLV**F**K**P**TP**K**SAT**PV**PIVVVALQSTTTPSAL 56  
 Kl IN---AS**D**DAVV-----V**K**SLV**F**K**P**TP**K**SQ**T**P**V**PIVVVALHSTTTPSGL 53  
 Cg LSD-KPA-**D**AVA-----V**K**SLV**F**K**P****KTAK**TAT**PV**PIVVVALQSTNTPSA 52  
 Ag LD----A-**E**CAAP-----V**K**QLV**F**K**P****K**VAKSAI**AV**PVVVVALQSTTT**P**VG**V** 52  
 Dh LATV--S**E**SAVS-----T**KT**LV**F**K**P****KTAK**SAT**PV**PVVV**F**ALQSTQ**T**PS**V** 55  
 Ca LATV-AS**P**ENGKALP-----T**K**SL**I**F**K****P****KTAK**TAT**P**IP**L**F**V**FALQDTT**T**PS**N**L 58  
 Ec TPNAKTIA**E**LVEQFN-----LPIEKTV**KT**LL-V-**K**AVEGSS-F**P**Q**V**ALLVRGDHELNEV 307

**K279 K284**

Ta L**R**KGLNV--NKLHMGDENDML**S**LLG--VGR**G**N**L**TP**F**SAMNDTEN-KVRVLF**D**IRLKS--K---V--DVV 132  
 Cn IGKLEL--KELRLASEDLIKEV**I**PSAASKDDVS**A**FALS-NPVPETLHLL**L**DAELAKSEE-----QHA 164  
 Um IAKHIGQ--KEMRLAAPEVLKEFLN--ATKDDVSALSITKDNASQ-LIAILDASLATSTD-----HFA 139  
 Pf LSNIL**KT**--NNLRFVDENLN**N**ILN--IQ**P****G**CL**S**PLA**I**KNDKEN-IVKLY**F**DE**E**IK**N**-----MQEVI 143  
 Py VSTQL**KT**--SNLRFVDENLN**K**ILN--V**N**P**G**SL**T**P**F**S**I**KS**D**KDN-IVKLY**F**DE**D**IK**N**-MD-----EVI 142  
 Cp LGQIFGVSGNKLRLADEVDLNDTLK--V**K**R**G**CL**T**PL**S**L**I**FEK-SGGIQV**F**DE**C**L**K**D-----KKVF 169  
 Pt FWK**T**LG**L**SSGNIRLSKEEQIADAL**K**--S**S**K**G**N**V**NPFAVANDTNNLV**K**NI**I**DE**L**TK**F**Q**R**-----LA 103  
 Sp AAKAVGS--KEARMAADLV**E**EV**F**G--IPPTDV**G**IFSVNKENAS-KVHV**V**LDAAL**I**QH-N---G--LLA 138  
 Sc IANATSS--KDPRLARDDLV**K**QAFQ--SESARAFILGDLANATS-NFHLLIDHELGT**V**-D---G--DTI 114  
 Kl IASVTST--KDPRLARDEL**F**Q**S**Q**F**K--IQSGKEFHLGH**L**AQAEG-AFKLLLDQQL**V**AL-A---D--DTV 111  
 Cg IA**H**HS**G**L--KDPRLARDEL**F**Q**S**FF**K**--CETAKGFTL**A**YLT**N**AE**S**-EFKLLID**N**N**L**ESV-A---P--ETL 110  
 Ag VA**H**AS**G**S--KDPRLARDEL**F**Q**S**H**F**G--VETAKAFDLSH**L**EQAQH-GFQ**L**LV**D**RELAAL-A---D--EAA 109  
 Dh IAKA**G**V--KE**P**RLAKDDLVTEFF**T**--V-SAKEVSIANLHKDLAGK**I**KL**V**DE**N**ITKA-S---D--DTV 113  
 Ca IAKS**A**G**V**--KE**P**RLAKDDLV**E**EFF**K**--T-TTKEVSIANLSKELAGK**I**K**I**VID**D**N**V**LKA-AK--N--EEL 117  
 Ec KAEK**L**PQ**V**ASPL**T**FATEEEIRAV**V**KAG**P**--**G**SL**G**P**V**NMP-----IPVV**I**D**R**T**V**AAMSDFAAGANID**G** 367

**GXXXP D350**

Ta AHPLSNDQSV**M**KMEDML--K**F**LTQIN**H**FP**T**FL-PLNDLDST**H**V**N**NI**D**-KNSVNSN**N**T**V**NSV**N**TNE**K**NK 198  
 Cn VHLTSSATLLIK**G**SD**I**K-A-YLDSLV-EGEGV**K**IV**D**FA----- 200  
 Um VHASSEQ**L**FM**T**GA**E**IA--K**Y**L**Q**S---TG**V**K**L**E**V**ID**F**AK**L**KAE**A**AT**P**AA**K**AS**A**PSSSSAS**A**P**G**ST---- 200  
 Pf IHPLHNYSS**L**Y**I**KTQ**D**VI--K**F**CE**S**---FN**H**AP**E**Y**V**Q**I**KE**D**TT**S**KAR**V**DK**K**ED--V**Q**E**E**MA**K**NE----- 200  
 Py IHPMHNYSC**I**Y**V**KT**T**D**V**I--K**Y**CD**L**---HN**H**T**P**E**F**IN**L**SD**S**K**D**TEN**Q**NI**K**R**D**DS**N**INE**S**SKD----- 200  
 Cp VHPLT**N**TES**F**SI**H**IND**I**V--K**F**AE**S**---CG**K**K**V**K**W**F----- 200  
 Pt LHP**I**ENTTT**I**E**I**SL**D**DL**Q**N-K**F**L**K**A---IN**R**Q**C**K**V**I**Q**LT**D**SA**K**Q**E**LE**Q**E**K**D**Q**Q**N**L**Q**T**L**A**I**TV**K**K**S**D**F**SE 168  
 Sp F**H**PS**S**SA**K**TV**F**V**S**PA**A**V**Q**--T**Y**L**K**S---V**G**V**N**P**I**IV**D**F**S**AP**G**SAT**A**P**S**K**P**AA**Q**KK**K**A**E**P**S**K**N**DA**A**I**E**--- 200  
 Sc L**Q**L**N**--D-ST**Y**M**K**K**S**D**M**M--K**F**L**N**N---F**E**DS**Q**K**V**V**D**F**S**Q**E**V**S**K**E**T**A**T**E**G**K**Q**Q**K**Q**Q**P**SK**A**G**T**A**A**A**A**A 176  
 Kl L**Q**L**N**--D-E**K**F**V**K**K**S**D**L**I**G-K**Y**L**N**S---F**E**P--L**E**V**D**F**S**Q**V**-----E**V**A**K**K**E**A**S**A**P**A**K**S-----A 160  
 Cg L**Q**L**N**--D-**E**LS**I**K**K**S**D**L**C**--S**F**LS**Q**---F**D**Q**Y**K**Q**IV**D**F**S**VE**I**K---K**E**A**Q**P**K**Q**K**E**K**PA**Q**T-----N 161  
 Ag V**G**LS--G--V**A**VE**K**G**A**L**M**--A**Y**L**Q**K---H**G**A--V**E**V**D**FA**Q**EV**Q**-----A**A**P**K**K**G**A**A**V**K**-----E**S** 158  
 Dh L**E**L**S**T**A**S**A**K**S**I**S**A**K**V**L**N--E**Y**I**A**S---T**G**I**E**V**V**S**V**D**F**SA**E**Q**A**A**A**PA**A**D**S**---K**K**D**A**L**K**---K**E**K**K**D 171  
 Ca L**K**L**S**T**Q**SS**A**AV**L**S**A**K**T**V**V**--E**F**L**Q**S---T**G**I**E**I**I**EV**D**F**S**AE**P**T**Q**AP**A**S**A**SP**G**S**G**A**A**SS**K**---K**E**K**Q**R 179  
 Ec K**H**Y**F**G**I**N**W**D**R**VA**T**PE**V**AD**I**R**N**V**V**AG**D**P**S**D**G**Q**G**AG**D**P**S**D**G**Q**G**R**L**L**I**K**R**G**I**EV**G**H**I**F**Q**L**G**T**K**Y**S**E**A**L**K**A 437

**H369**
